# Supplementary material for: Trends in obesity and adiposity measures by race or ethnicity among adults in the United States 2011-18: population based study
Source: PubMed Central journal article supplement — BMJ. 2021 Mar 16;372:n365. doi: 10.1136/bmj.n365 (PMC7961695; doi:10.1136/bmj.n365), 2021-03-16
Supplement: liub060315.ww.pdf [file liub060315.ww.pdf]

## Supplementary Online Content

Appendix Figure 1. Flow chart of participants

Appendix Table 1. Population Characteristics for Adults 20 Years or Older: NHANES, 2011-2018

Appendix Table 2. Unweighted Sample Sizes for Adults 20 Years and Older by Sex, Age Group, and Race/Ethnicity: NHANES 2017-2018

Appendix Table 3. Trends in Unadjusted Mean BMI by Race/Ethnicity: United State, 2011-2018 (N=21,093)

Appendix Table 4. Trends in Unadjusted Mean Waist Circumference by Race/Ethnicity: United State, 2011-2018 (N=20,080)

Appendix Table 5. Trends in Unadjusted Body Fat Percentage by Race/Ethnicity: United State, 2011-2018 (N=10,864)

Appendix Table 6. Trends in Age-Adjusted Total Body Fat by Race/Ethnicity among Adults aged 20-59 years: United State, 2011-2018 (N=10,864)

Appendix Table 7. Trends in Age-Adjusted Adiposity Measures among Adults 20-59 years old: United State, 2011-2018

Appendix Table 8. Trends in Unadjusted Lean Mass by Race/Ethnicity: United State, 2011-2018 (N=10,864)

Appendix Table 9. Trends in Prevalence of Age-Adjusted General Obesity (BMI  $\geq 30$  kg/m<sup>2</sup>) among non-Hispanic Asians: United State, 2011-2018

Appendix Table 10. The Number of Cases of Obesity by Race/Ethnicity: United State, 2011-2018

Appendix Table 11. Trends in Unadjusted Prevalence of Obesity by Race/Ethnicity: United State, 2011-2018

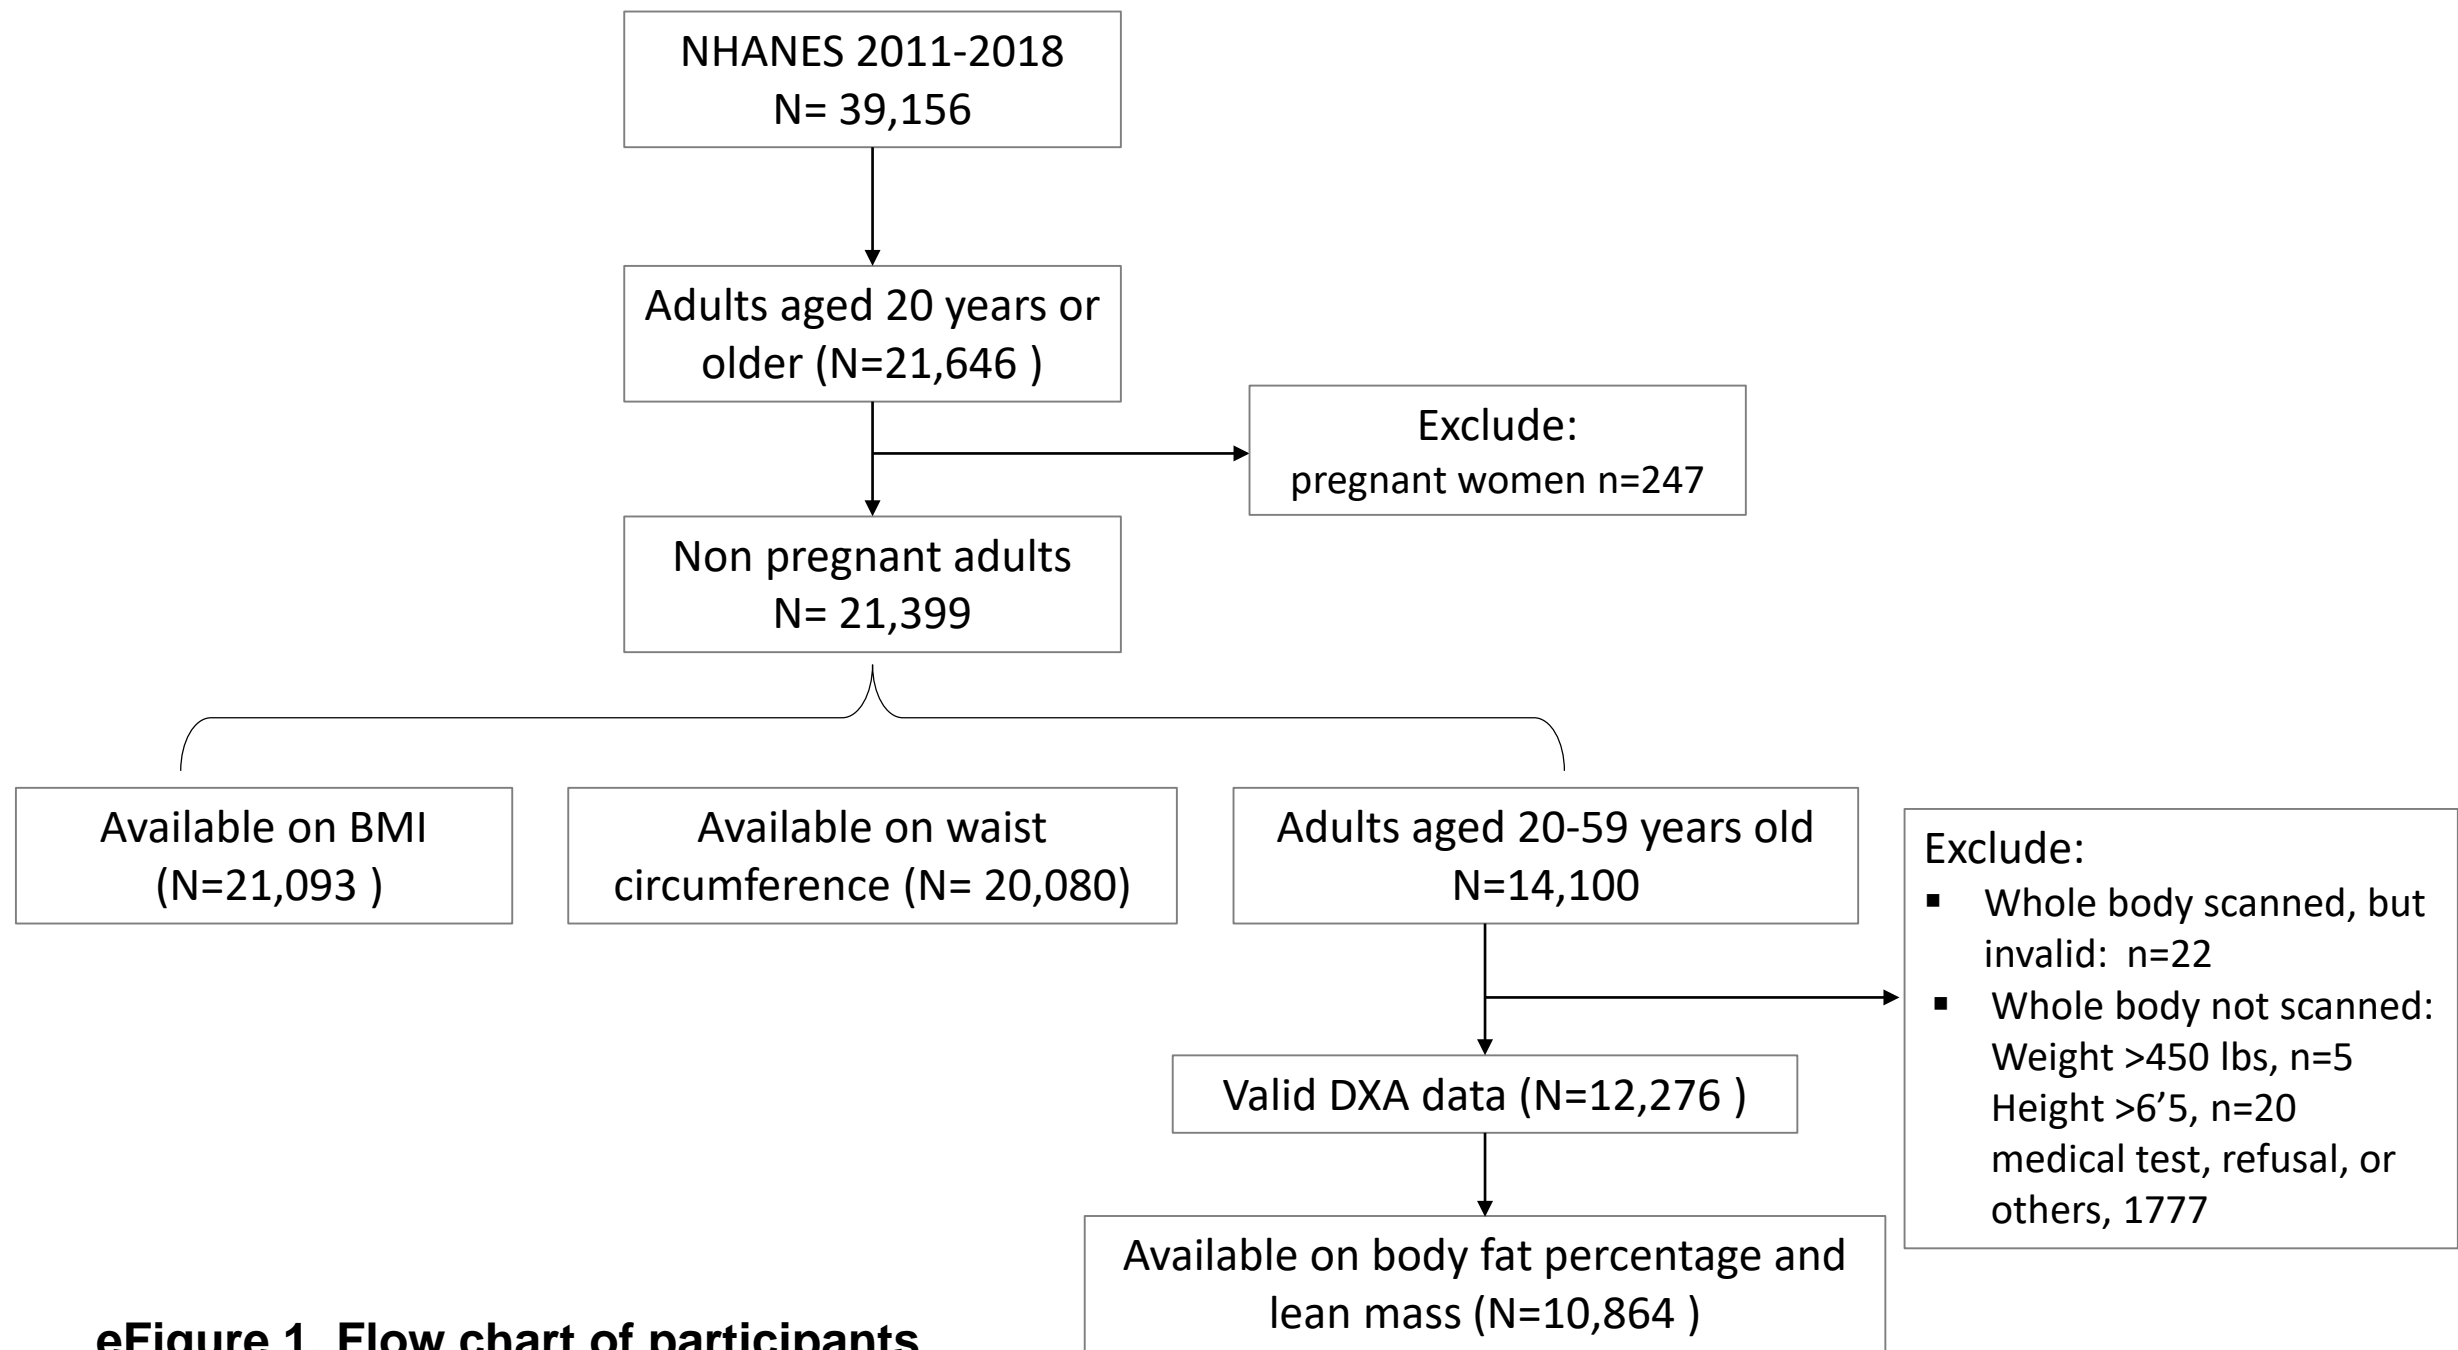

**eFigure 1. Flow chart of participants**

**Appendix Table 1. Population Characteristics for Adults 20 Years or Older: NHANES, 2011-2018**

| Variables          | 2011-2012                      |                             | 2013-2014                      |                             | 2015-2016                      |                             | 2017-2018                      |                             |
|--------------------|--------------------------------|-----------------------------|--------------------------------|-----------------------------|--------------------------------|-----------------------------|--------------------------------|-----------------------------|
|                    | Unweighted No. of participants | Weighted percentage (95%CI) | Unweighted No. of participants | Weighted percentage (95%CI) | Unweighted No. of participants | Weighted percentage (95%CI) | Unweighted No. of participants | Weighted percentage (95%CI) |
| Overall            | 5181                           | /                           | 5455                           | /                           | 5337                           | /                           | 5120                           | /                           |
| Age, years         |                                |                             |                                |                             |                                |                             |                                |                             |
| 20-39              | 1808                           | 35.8 (30.9 to 40.6)         | 1810                           | 35.7 (33.6 to 37.9)         | 1780                           | 35.5 (32.7 to 38.2)         | 1523                           | 35.7 (33.1 to 38.3)         |
| 40-59              | 1727                           | 38.4 (35.6 to 41.2)         | 1896                           | 37.4 (35.6 to 39.2)         | 1785                           | 36.4 (34.0 to 38.7)         | 1634                           | 35.2 (32.5 to 37.9)         |
| ≥ 60               | 1646                           | 25.9 (23.3 to 28.4)         | 1749                           | 26.9 (25.0 to 28.8)         | 1772                           | 28.2 (25.2 to 31.2)         | 1963                           | 29.1 (25.9 to 32.4)         |
| Sex                |                                |                             |                                |                             |                                |                             |                                |                             |
| Men                | 2585                           | 48.6 (47.0 to 50.3)         | 2638                           | 48.6 (47.4 to 49.9)         | 2583                           | 48.5 (47.4 to 49.6)         | 2493                           | 48.6 (46.9 to 50.4)         |
| Women              | 2596                           | 51.4 (49.7 to 53.0)         | 2817                           | 51.4 (50.1 to 52.6)         | 2754                           | 51.5 (50.4 to 52.6)         | 2627                           | 51.4 (49.6 to 53.1)         |
| Race/ethnicity     |                                |                             |                                |                             |                                |                             |                                |                             |
| Hispanic           | 1037                           | 14.2 (9.3 to 19.2)          | 1214                           | 14.7 (9.9 to 19.4)          | 1633                           | 15.2 (10.0 to 20.5)         | 1153                           | 15.6 (11.7 to 19.4)         |
| Non-Hispanic white | 1899                           | 66.6 (58.9 to 74.3)         | 2343                           | 66.0 (59.5 to 72.5)         | 1751                           | 64.0 (56.3 to 71.7)         | 1764                           | 62.5 (57.4 to 67.7)         |
| Non-Hispanic black | 1364                           | 11.4 (6.9 to 15.8)          | 1115                           | 11.3 (8.1 to 14.5)          | 1126                           | 11.3 (7.0 to 15.6)          | 1204                           | 11.3 (8.1 to 14.5)          |
| Non-Hispanic Asian | 733                            | 5.2 (3.4 to 7.0)            | 623                            | 5.3 (4.1 to 6.6)            | 637                            | 5.8 (3.3 to 8.4)            | 739                            | 5.8 (3.9 to 7.8)            |
| Other              | 148                            | 2.6 (1.8 to 3.4)            | 160                            | 2.7 (1.8 to 3.6)            | 190                            | 3.6 (2.9 to 4.4)            | 260                            | 4.7 (3.5 to 5.9)            |

**Appendix Table 2. Unweighted Sample Sizes for Adults 20 Years and Older by Sex, Age Group, and Race/Ethnicity: NHANES 2017-2018**

| Age groups, year | No. of Participants by Race/Ethnicity |          |                    |                    |                    |                      |
|------------------|---------------------------------------|----------|--------------------|--------------------|--------------------|----------------------|
|                  | Overall                               | Hispanic | Non-Hispanic white | Non-Hispanic black | Non-Hispanic Asian | Other race/ethnicity |
| All participants |                                       |          |                    |                    |                    |                      |
| 20-39            | 1523                                  | 382      | 478                | 340                | 235                | 88                   |
| 40-59            | 1634                                  | 387      | 475                | 381                | 292                | 99                   |
| ≥60              | 1963                                  | 384      | 811                | 483                | 212                | 73                   |
| Men              |                                       |          |                    |                    |                    |                      |
| 20-39            | 729                                   | 190      | 226                | 158                | 109                | 46                   |
| 40-59            | 770                                   | 169      | 234                | 173                | 137                | 57                   |
| ≥60              | 994                                   | 190      | 419                | 245                | 98                 | 42                   |
| Women            |                                       |          |                    |                    |                    |                      |
| 20-39            | 794                                   | 192      | 252                | 182                | 126                | 42                   |
| 40-59            | 864                                   | 218      | 241                | 208                | 155                | 42                   |
| ≥60              | 969                                   | 194      | 392                | 238                | 114                | 31                   |

**Appendix Table 3. Trends in Unadjusted Mean BMI by Race/Ethnicity: United State, 2011-2018 (N=21,093)**

| Variables           | Mean of unadjusted BMI, kg/m <sup>2</sup> , mean (95%CI) |                     |                     |                     | P for trend |
|---------------------|----------------------------------------------------------|---------------------|---------------------|---------------------|-------------|
|                     | 2011-2012                                                | 2013-2014           | 2015-2016           | 2017-2018           |             |
| Overall             | 28.7 (28.3 to 29.2)                                      | 29.2 (28.8 to 29.5) | 29.4 (28.8 to 29.9) | 29.8 (29.2 to 30.4) | 0.002       |
| All participants    |                                                          |                     |                     |                     |             |
| Hispanic            | 29.5 (29.0 to 30.0)                                      | 29.8 (29.1 to 30.5) | 30.6 (29.9 to 31.3) | 30.3 (29.8 to 30.8) | 0.008       |
| Non-Hispanic white  | 28.5 (27.9 to 29.1)                                      | 29.1 (28.7 to 29.5) | 29.2 (28.7 to 29.8) | 29.7 (28.9 to 30.4) | 0.008       |
| Non-Hispanic black  | 30.9 (30.3 to 31.4)                                      | 30.9 (30.3 to 31.5) | 30.6 (29.9 to 31.3) | 31.2 (30.7 to 31.8) | 0.48        |
| Non-Hispanic Asian  | 24.5 (24.0 to 25.0)                                      | 24.8 (24.4 to 25.2) | 25.0 (24.7 to 25.2) | 26.2 (25.9 to 26.6) | <0.001      |
| Other               | 29.3 (27.4 to 31.3)                                      | 29.5 (28.1 to 30.9) | 30.5 (29.4 to 31.5) | 30.6 (29.2 to 32.0) | 0.17        |
| Male                |                                                          |                     |                     |                     |             |
| Hispanic            | 29.2 (28.6 to 29.8)                                      | 29.3 (28.5 to 30.2) | 30.1 (29.3 to 30.8) | 30.3 (29.6 to 31.0) | 0.008       |
| Non-Hispanic white  | 28.5 (27.9 to 29.0)                                      | 29.0 (28.6 to 29.3) | 29.2 (28.6 to 29.8) | 29.8 (29.1 to 30.5) | 0.003       |
| Non-Hispanic black  | 29.0 (28.4 to 29.5)                                      | 28.9 (28.3 to 29.5) | 29.0 (28.2 to 29.8) | 29.4 (28.7 to 30.0) | 0.31        |
| Non-Hispanic Asian  | 24.9 (24.3 to 25.5)                                      | 25.4 (25.0 to 25.8) | 25.3 (25.0 to 25.7) | 27.0 (26.5 to 27.5) | <0.001      |
| Other               | 30.5 (26.7 to 34.3)                                      | 29.0 (27.1 to 30.8) | 30.1 (28.3 to 31.9) | 30.2 (28.4 to 31.9) | 0.90        |
| Female <sup>c</sup> |                                                          |                     |                     |                     |             |
| Hispanic            | 29.8 (29.2 to 30.5)                                      | 30.3 (29.3 to 31.2) | 31.1 (30.4 to 31.9) | 30.3 (29.5 to 31.1) | 0.17        |
| Non-Hispanic white  | 28.5 (27.7 to 29.2)                                      | 29.2 (28.6 to 29.7) | 29.3 (28.6 to 30.0) | 29.6 (28.5 to 30.7) | 0.07        |
| Non-Hispanic black  | 32.4 (31.7 to 33.1)                                      | 32.6 (31.8 to 33.3) | 31.9 (31.0 to 32.8) | 32.8 (31.9 to 33.7) | 0.73        |
| Non-Hispanic Asian  | 24.2 (23.6 to 24.8)                                      | 24.3 (23.6 to 25.0) | 24.6 (24.1 to 25.1) | 25.6 (25.1 to 26.1) | <0.001      |
| Other               | 28.1 (26.5 to 29.8)                                      | 30.2 (28.1 to 32.2) | 30.9 (29.6 to 32.1) | 31.2 (29.6 to 32.8) | 0.01        |

**Appendix Table 4. Trends in unadjusted Mean Waist Circumference by Race/Ethnicity: United State, 2011-2018 (N=20,080)**

| Variables          | Mean of unadjusted waist circumference, cm, mean (95%CI) |                        |                        |                        | P for trend |
|--------------------|----------------------------------------------------------|------------------------|------------------------|------------------------|-------------|
|                    | 2011-2012                                                | 2013-2014              | 2015-2016              | 2017-2018              |             |
| Overall            | 98.7 (97.5 to 99.9)                                      | 99.6 (98.9 to 100.2)   | 100.3 (98.9 to 101.8)  | 100.8 (99.2 to 102.3)  | 0.02        |
| All participants   |                                                          |                        |                        |                        |             |
| Hispanic           | 98.6 (97.1 to 100.0)                                     | 99.5 (97.5 to 101.6)   | 100.8 (99.6 to 102.1)  | 100.5 (99.3 to 101.7)  | 0.019       |
| Non-Hispanic white | 99.2 (97.8 to 100.7)                                     | 100.3 (99.4 to 101.1)  | 101.1 (99.5 to 102.6)  | 101.5 (99.6 to 103.5)  | 0.03        |
| Non-Hispanic black | 100.7 (99.4 to 102.0)                                    | 100.8 (99.4 to 102.1)  | 100.7 (98.7 to 102.7)  | 101.2 (99.9 to 102.5)  | 0.62        |
| Non-Hispanic Asian | 87.1 (85.7 to 88.6)                                      | 88.2 (87.1 to 89.3)    | 88.4 (87.5 to 89.4)    | 90.6 (89.9 to 91.4)    | <0.001      |
| Other              | 100.0 (94.4 to 105.7)                                    | 99.2 (94.9 to 103.4)   | 102.5 (100.2 to 104.8) | 103.4 (100.3 to 106.6) | 0.14        |
| Male               |                                                          |                        |                        |                        |             |
| Hispanic           | 100.5 (98.6 to 102.5)                                    | 101.1 (98.5 to 103.6)  | 101.9 (100.2 to 103.6) | 103.0 (101.5 to 104.6) | 0.03        |
| Non-Hispanic white | 102.2 (100.6 to 103.9)                                   | 103.4 (102.3 to 104.5) | 103.8 (102.0 to 105.6) | 104.7 (102.7 to 106.7) | 0.046       |
| Non-Hispanic black | 99.1 (97.5 to 100.6)                                     | 98.3 (96.4 to 100.2)   | 99.0 (96.5 to 101.6)   | 99.4 (97.3 to 101.5)   | 0.64        |
| Non-Hispanic Asian | 89.8 (88.3 to 91.3)                                      | 91.0 (89.8 to 92.3)    | 91.4 (90.1 to 92.8)    | 94.9 (94.0 to 95.9)    | <0.001      |
| Other              | 105.5 (97.1 to 113.9)                                    | 100.3 (95.7 to 105.0)  | 104.3 (99.7 to 108.8)  | 105.5 (100.7 to 110.3) | 0.65        |
| Female             |                                                          |                        |                        |                        |             |
| Hispanic           | 96.5 (94.6 to 98.4)                                      | 98.0 (95.4 to 100.6)   | 99.7 (98.4 to 100.9)   | 97.9 (96.2 to 99.7)    | 0.16        |
| Non-Hispanic white | 96.2 (94.7 to 97.8)                                      | 97.3 (96.0 to 98.5)    | 98.5 (96.7 to 100.2)   | 98.5 (95.8 to 101.2)   | 0.08        |
| Non-Hispanic black | 102.1 (100.6 to 103.5)                                   | 102.9 (101.4 to 104.3) | 102.1 (99.6 to 104.6)  | 102.7 (101.1 to 104.3) | 0.73        |
| Non-Hispanic Asian | 84.7 (83.1 to 86.4)                                      | 85.7 (84.1 to 87.4)    | 85.7 (84.2 to 87.1)    | 86.8 (85.7 to 87.9)    | 0.04        |
| Other              | 94.2 (89.4 to 99.1)                                      | 97.8 (91.7 to 103.9)   | 100.9 (98.4 to 103.4)  | 100.9 (97.8 to 103.9)  | 0.01        |

**Appendix Table 5. Trends in Unadjusted Body Fat Percentage by Race/Ethnicity: United State, 2011-2018 (N=10,864)<sup>a</sup>**

| Variables          | Mean of unadjusted body fat percentage, mean (95%CI) |                     |                     |                     | P for trend |
|--------------------|------------------------------------------------------|---------------------|---------------------|---------------------|-------------|
|                    | 2011-2012                                            | 2013-2014           | 2015-2016           | 2017-2018           |             |
| Overall            | 32.7 (32.0 to 33.5)                                  | 33.1 (32.6 to 33.7) | 32.9 (32.3 to 33.5) | 33.1 (32.4 to 33.7) | 0.59        |
| All participants   |                                                      |                     |                     |                     |             |
| Hispanic           | 33.5 (32.6 to 34.4)                                  | 33.7 (32.8 to 34.7) | 33.9 (33.1 to 34.7) | 34.0 (33.2 to 34.8) | 0.41        |
| Non-Hispanic white | 32.8 (31.9 to 33.6)                                  | 33.2 (32.5 to 34.0) | 32.9 (32.2 to 33.6) | 32.9 (32.1 to 33.8) | 0.88        |
| Non-Hispanic black | 32.6 (31.9 to 33.3)                                  | 32.6 (31.9 to 33.4) | 32.0 (30.7 to 33.2) | 31.8 (30.4 to 33.1) | 0.16        |
| Non-Hispanic Asian | 30.5 (29.6 to 31.5)                                  | 31.7 (31.1 to 32.2) | 31.4 (30.7 to 32.0) | 32.7 (32.0 to 33.4) | <0.001      |
| Other              | 31.7 (29.7 to 33.7)                                  | 31.9 (29.8 to 34.1) | 33.1 (30.3 to 35.8) | 33.9 (31.9 to 35.9) | 0.08        |
| Male               |                                                      |                     |                     |                     |             |
| Hispanic           | 27.8 (27.0 to 28.6)                                  | 28.0 (27.1 to 28.9) | 28.3 (27.5 to 29.2) | 28.4 (27.3 to 29.5) | 0.31        |
| Non-Hispanic white | 27.3 (26.7 to 27.9)                                  | 28.1 (27.2 to 28.9) | 26.9 (26.1 to 27.6) | 27.2 (26.5 to 28.0) | 0.33        |
| Non-Hispanic black | 25.0 (24.4 to 25.5)                                  | 25.0 (24.3 to 25.8) | 24.9 (23.6 to 26.1) | 25.1 (23.8 to 26.4) | 0.91        |
| Non-Hispanic Asian | 25.4 (24.5 to 26.4)                                  | 26.7 (25.9 to 27.5) | 26.8 (26.2 to 27.4) | 28.2 (27.6 to 28.7) | <0.001      |
| Other              | 28.1 (25.7 to 30.5)                                  | 26.4 (24.2 to 28.6) | 27.0 (23.8 to 30.3) | 28.6 (26.8 to 30.5) | 0.48        |
| Female             |                                                      |                     |                     |                     |             |
| Hispanic           | 40.1 (39.3 to 41.0)                                  | 40.0 (39.3 to 40.7) | 40.2 (39.4 to 40.9) | 40.0 (39.3 to 40.8) | 0.95        |
| Non-Hispanic white | 38.5 (37.7 to 39.3)                                  | 38.6 (38.1 to 39.1) | 38.5 (37.6 to 39.3) | 38.1 (36.6 to 39.6) | 0.55        |
| Non-Hispanic black | 39.8 (38.8 to 40.7)                                  | 39.9 (39.3 to 40.5) | 39.0 (38.4 to 39.6) | 39.1 (37.9 to 40.4) | 0.23        |
| Non-Hispanic Asian | 36.1 (34.8 to 37.4)                                  | 36.5 (36.0 to 37.1) | 36.4 (35.2 to 37.6) | 37.1 (35.8 to 38.4) | 0.30        |
| Other              | 35.8 (33.0 to 38.6)                                  | 38.2 (36.4 to 39.9) | 38.2 (35.9 to 40.4) | 39.8 (37.8 to 41.8) | 0.02        |

<sup>a</sup> percent body fat was available among adults aged 20-59 years.

**Appendix Table 6. Trends in Age-Adjusted Total Body Fat by Race/Ethnicity among Adults aged 20-59 years: United State, 2011-2018 (N=10,864)<sup>a</sup>**

| Variables                     | Mean of age-adjusted total body fat, kg, mean (95%CI) |                     |                     |                     | P for trend |
|-------------------------------|-------------------------------------------------------|---------------------|---------------------|---------------------|-------------|
|                               | 2011-2012                                             | 2013-2014           | 2015-2016           | 2017-2018           |             |
| Overall <sup>b</sup>          | 27.3 (26.5 to 28.1)                                   | 28.0 (27.1 to 28.8) | 27.9 (26.9 to 28.8) | 27.7 (26.5 to 28.9) | 0.61        |
| All participants <sup>c</sup> |                                                       |                     |                     |                     |             |
| Hispanic                      | 27.4 (26.3 to 28.6)                                   | 28.2 (26.5 to 29.8) | 28.5 (27.5 to 29.5) | 28.2 (26.8 to 29.5) | 0.38        |
| Non-Hispanic white            | 27.3 (26.3 to 28.2)                                   | 28.3 (27.0 to 29.6) | 28.1 (26.9 to 29.3) | 27.7 (26.2 to 29.3) | 0.87        |
| Non-Hispanic black            | 29.8 (28.8 to 30.9)                                   | 29.2 (28.0 to 30.4) | 28.9 (27.4 to 30.4) | 28.8 (27.0 to 30.5) | 0.34        |
| Non-Hispanic Asian            | 20.7 (19.7 to 21.7)                                   | 21.3 (20.8 to 21.8) | 21.5 (20.8 to 22.2) | 23.2 (22.6 to 23.7) | < 0.001     |
| Other                         | 26.7 (22.9 to 30.5)                                   | 27.4 (23.6 to 31.3) | 28.4 (25.1 to 31.7) | 29.9 (27.2 to 32.6) | 0.14        |
| Male <sup>d</sup>             |                                                       |                     |                     |                     |             |
| Hispanic                      | 24.6 (23.3 to 25.9)                                   | 25.2 (23.3 to 27.2) | 25.4 (24.1 to 26.7) | 25.8 (24.1 to 27.6) | 0.34        |
| Non-Hispanic white            | 24.9 (23.7 to 26.0)                                   | 26.1 (24.4 to 27.9) | 24.9 (23.5 to 26.3) | 25.0 (23.8 to 26.3) | 0.75        |
| Non-Hispanic black            | 23.6 (22.7 to 24.5)                                   | 23.3 (22.0 to 24.6) | 23.7 (21.8 to 25.6) | 24.3 (22.6 to 26.0) | 0.58        |
| Non-Hispanic Asian            | 19.2 (18.2 to 20.2)                                   | 20.3 (19.4 to 21.3) | 20.4 (19.8 to 21.1) | 23.0 (22.0 to 23.9) | < 0.001     |
| Other                         | 27.6 (22.8 to 32.4)                                   | 24.2 (20.1 to 28.2) | 25.7 (20.6 to 30.9) | 26.8 (22.8 to 30.8) | 0.98        |
| Female <sup>d</sup>           |                                                       |                     |                     |                     |             |
| Hispanic                      | 30.6 (29.4 to 31.8)                                   | 31.3 (29.6 to 33.0) | 31.9 (31.0 to 32.9) | 30.7 (29.4 to 31.9) | 0.70        |
| Non-Hispanic white            | 29.9 (28.8 to 31.0)                                   | 30.6 (29.2 to 31.9) | 31.0 (29.4 to 32.6) | 30.2 (27.6 to 32.8) | 0.67        |
| Non-Hispanic black            | 35.7 (34.2 to 37.2)                                   | 34.9 (33.2 to 36.6) | 33.9 (32.8 to 35.1) | 33.7 (31.2 to 36.2) | 0.10        |
| Non-Hispanic Asian            | 22.3 (20.9 to 23.8)                                   | 22.3 (21.6 to 23.1) | 22.7 (21.4 to 23.9) | 23.4 (22.2 to 24.6) | 0.18        |
| Other                         | 25.7 (22.5 to 29.0)                                   | 31.1 (27.0 to 35.2) | 30.6 (27.5 to 33.7) | 33.2 (29.8 to 36.5) | 0.005       |



<sup>a</sup> percent body fat was available among adults aged 20-59 years.

<sup>b</sup> P for trend adjusted for age, sex, and race/ethnicity.

<sup>c</sup> P for trend adjusted for age and sex.

<sup>d</sup> P for trend adjusted for age.

**Appendix Table 7. Trends in Age-Adjusted Adiposity Measures among Adults 20-59 years old: United State, 2011-2018**

| <b>Variables</b>                      | <b>2011-2012</b>      | <b>2013-2014</b>     | <b>2015-2016</b>      | <b>2017-2018</b>      | <b>P for trend<sup>a</sup></b> |
|---------------------------------------|-----------------------|----------------------|-----------------------|-----------------------|--------------------------------|
| BMI, kg/m <sup>2</sup> , mean (95%CI) | 28.7 (28.2 to 29.1)   | 29.1 (28.6 to 29.7)  | 29.3 (28.6 to 30.0)   | 29.9 (29.2 to 30.5)   | 0.002                          |
| Hispanic                              | 29.6 (29.1 to 30.1)   | 29.9 (29.2 to 30.6)  | 30.6 (30.0 to 31.3)   | 30.4 (29.7 to 31.0)   | 0.02                           |
| Non-Hispanic white                    | 28.3 (27.7 to 28.9)   | 28.9 (28.2 to 29.6)  | 29.0 (28.2 to 29.7)   | 29.6 (28.7 to 30.6)   | 0.02                           |
| Non-Hispanic black                    | 30.9 (30.3 to 31.5)   | 31.0 (30.3 to 31.7)  | 30.8 (29.9 to 31.6)   | 31.5 (30.8 to 32.3)   | 0.25                           |
| Non-Hispanic Asian                    | 24.5 (24.0 to 25.0)   | 24.8 (24.5 to 25.1)  | 25.0 (24.7 to 25.4)   | 26.3 (26.0 to 26.7)   | < 0.001                        |
| Other                                 | 29.0 (26.8 to 31.3)   | 29.9 (28.4 to 31.5)  | 30.7 (29.1 to 32.2)   | 31.0 (29.5 to 32.5)   | 0.10                           |
| Waist circumference, cm, mean (95%CI) | 97.4 (96.3 to 98.5)   | 98.3 (97.2 to 99.5)  | 98.9 (97.2 to 100.6)  | 99.5 (97.7 to 101.3)  | 0.02                           |
| Hispanic                              | 98.4 (96.8 to 99.9)   | 99.3 (97.2 to 101.5) | 100.4 (99.2 to 101.7) | 100.2 (98.6 to 101.7) | 0.07                           |
| Non-Hispanic white                    | 97.5 (96.1 to 99.0)   | 98.5 (96.9 to 100.2) | 99.1 (97.1 to 101.0)  | 99.7 (97.3 to 102.2)  | 0.09                           |
| Non-Hispanic black                    | 100.1 (98.8 to 101.5) | 99.8 (98.2 to 101.5) | 100.1 (97.6 to 102.6) | 100.9 (99.1 to 102.6) | 0.42                           |
| Non-Hispanic Asian                    | 86.5 (85.1 to 87.9)   | 87.6 (86.9 to 88.4)  | 88.1 (87.0 to 89.2)   | 90.0 (89.1 to 90.9)   | < 0.001                        |
| Other                                 | 97.3 (91.5 to 103.0)  | 99.3 (94.3 to 104.4) | 101.8 (98.2 to 105.4) | 102.9 (99.3 to 106.4) | 0.06                           |
| Obesity, % (95%CI)                    | 35.3 (32.3 to 38.2)   | 38.1 (35.3 to 40.8)  | 39.9 (35.7 to 44.1)   | 43.3 (39.8 to 47.0)   | 0.001                          |
| Hispanic                              | 42.4 (38.6 to 46.2)   | 43.7 (39.2 to 48.2)  | 47.0 (42.3 to 51.7)   | 45.2 (40.7 to 49.6)   | 0.18                           |
| Non-Hispanic white                    | 32.2 (28.2 to 36.3)   | 35.6 (32.1 to 39.1)  | 37.0 (31.9 to 42.1)   | 41.5 (35.9 to 47.0)   | 0.008                          |
| Non-Hispanic black                    | 47.6 (43.6 to 51.7)   | 48.5 (43.8 to 53.2)  | 47.2 (41.4 to 53.1)   | 50.6 (47.1 to 54.2)   | 0.30                           |
| Non-Hispanic Asian                    | 21.2 (16.9 to 25.5)   | 23.8 (20.5 to 27.2)  | 25.9 (19.7 to 32.2)   | 36.1 (31.5 to 40.7)   | < 0.001                        |
| Other                                 | 30.7 (18.2 to 43.1)   | 38.8 (26.8 to 50.8)  | 52.0 (40.1 to 63.9)   | 51.6 (38.4 to 64.8)   | 0.02                           |
| Abdominal obesity, % (95%CI)          | 50.5 (46.7 to 54.2)   | 52.0 (49.5 to 54.5)  | 54.5 (49.7 to 59.4)   | 55.1 (51.3 to 59.0)   | 0.04                           |
| Hispanic                              | 55.7 (51.7 to 59.7)   | 58.0 (53.2 to 62.8)  | 58.4 (54.3 to 62.4)   | 56.7 (52.5 to 60.8)   | 0.67                           |

---

|                    |                     |                     |                     |                     |       |
|--------------------|---------------------|---------------------|---------------------|---------------------|-------|
| Non-Hispanic white | 49.8 (44.8 to 54.9) | 51.3 (47.7 to 54.9) | 55.5 (49.8 to 61.1) | 55.5 (49.9 to 61.2) | 0.07  |
| Non-Hispanic black | 58.3 (55.0 to 61.6) | 59.4 (54.6 to 64.2) | 56.0 (50.0 to 62.1) | 59.8 (55.9 to 63.6) | 0.84  |
| Non-Hispanic Asian | 22.1 (18.4 to 25.8) | 23.3 (19.7 to 26.8) | 24.6 (19.8 to 29.4) | 29.3 (26.7 to 31.9) | 0.002 |
| Other              | 49.3 (34.4 to 64.3) | 50.4 (37.0 to 63.9) | 62.0 (51.1 to 72.8) | 65.3 (55.4 to 75.2) | 0.03  |

---

<sup>a</sup> P for trend adjusted for age, sex, and race/ethnicity.

**Appendix Table 8. Trends in Unadjusted Lean Mass by Race/Ethnicity: United State, 2011-2018 (N=10,864)<sup>a</sup>**

| Variables          | Mean of unadjusted lean mass, kg, mean (95%CI) |                     |                     |                     | P for trend |
|--------------------|------------------------------------------------|---------------------|---------------------|---------------------|-------------|
|                    | 2011-2012                                      | 2013-2014           | 2015-2016           | 2017-2018           |             |
| Overall            | 52.7 (52.0 to 53.4)                            | 52.7 (51.8 to 53.6) | 52.8 (51.9 to 53.6) | 52.1 (51.3 to 52.9) | 0.31        |
| All participants   |                                                |                     |                     |                     |             |
| Hispanic           | 51.0 (50.1 to 51.8)                            | 51.8 (50.4 to 53.2) | 51.6 (50.9 to 52.3) | 51.5 (50.6 to 52.5) | 0.49        |
| Non-Hispanic white | 53.1 (52.1 to 54.2)                            | 53.2 (51.9 to 54.4) | 53.3 (52.3 to 54.3) | 52.4 (51.3 to 53.5) | 0.38        |
| Non-Hispanic black | 56.1 (55.2 to 57.0)                            | 55.4 (54.0 to 56.8) | 56.2 (55.4 to 56.9) | 55.1 (54.3 to 55.9) | 0.31        |
| Non-Hispanic Asian | 44.6 (43.7 to 45.4)                            | 43.9 (43.0 to 44.8) | 44.8 (44.2 to 45.4) | 45.6 (44.3 to 46.8) | 0.06        |
| Other              | 53.4 (49.1 to 57.7)                            | 54.5 (50.5 to 58.6) | 53.1 (48.9 to 57.2) | 54.2 (52.3 to 56.2) | 0.89        |
| Male               |                                                |                     |                     |                     |             |
| Hispanic           | 58.9 (57.6 to 60.3)                            | 59.9 (58.2 to 61.6) | 59.0 (57.8 to 60.1) | 60.4 (59.0 to 61.7) | 0.26        |
| Non-Hispanic white | 61.8 (60.7 to 62.9)                            | 61.8 (60.3 to 63.3) | 62.0 (60.4 to 63.6) | 61.3 (59.8 to 62.8) | 0.74        |
| Non-Hispanic black | 63.2 (62.3 to 64.1)                            | 62.8 (61.2 to 64.4) | 63.9 (62.3 to 65.5) | 62.4 (60.9 to 63.9) | 0.70        |
| Non-Hispanic Asian | 52.2 (51.0 to 53.3)                            | 52.2 (51.2 to 53.2) | 52.3 (51.2 to 53.4) | 54.9 (53.1 to 56.6) | 0.009       |
| Other              | 64.3 (59.2 to 69.5)                            | 61.8 (57.2 to 66.5) | 62.3 (57.8 to 66.8) | 62.0 (57.3 to 66.7) | 0.57        |
| Female             |                                                |                     |                     |                     |             |
| Hispanic           | 41.8 (41.1 to 42.6)                            | 43.1 (41.7 to 44.5) | 43.4 (42.6 to 44.2) | 42.1 (41.5 to 42.7) | 0.64        |
| Non-Hispanic white | 44.0 (43.2 to 44.8)                            | 44.2 (43.0 to 45.4) | 45.3 (44.3 to 46.3) | 44.3 (43.1 to 45.5) | 0.26        |
| Non-Hispanic black | 49.4 (48.4 to 50.4)                            | 48.3 (46.9 to 49.7) | 48.5 (47.3 to 49.6) | 47.1 (45.2 to 49.0) | 0.03        |
| Non-Hispanic Asian | 36.2 (35.5 to 36.9)                            | 35.8 (34.8 to 36.9) | 36.5 (35.4 to 37.7) | 36.6 (36.0 to 37.1) | 0.22        |
| Other              | 41.1 (37.6 to 44.5)                            | 46.3 (42.8 to 49.8) | 45.2 (43.2 to 47.3) | 45.5 (44.0 to 47.0) | 0.08        |

<sup>a</sup> percent body fat was available among adults aged 20-59 years

**Appendix Table 9. Trends in Prevalence of Age-Adjusted General Obesity (BMI  $\geq$ 30 kg/m<sup>2</sup>) among non-Hispanic Asians: United State, 2011-2018**

| Non-Hispanic Asians | Prevalence of age adjusted obesity defined by BMI, % (95% CI) |                    |                     |                     | <i>P</i> for trend |
|---------------------|---------------------------------------------------------------|--------------------|---------------------|---------------------|--------------------|
|                     | 2011-2012                                                     | 2013-2014          | 2015-2016           | 2017-2018           |                    |
| All Asians          | 10.8 (7.8 to 13.8)                                            | 12.6 (9.8 to 15.4) | 12.7 (10.2 to 15.1) | 17.4 (14.7 to 20.2) | 0.002 <sup>a</sup> |
| Male                | 10.0 (6.6 to 13.4)                                            | 12.6 (8.8 to 16.4) | 10.1 (7.3 to 12.8)  | 17.5 (12.9 to 22.0) | 0.02 <sup>b</sup>  |
| Female              | 11.4 (6.8 to 16.1)                                            | 12.4 (7.9 to 16.8) | 14.8 (11.9 to 17.6) | 17.2 (14.3 to 20.0) | 0.03 <sup>b</sup>  |

<sup>a</sup> *P* for trend adjusted for age and sex.

<sup>b</sup> *P* for trend adjusted for age.

**Appendix Table 10. The Number of Cases of Obesity by Race/Ethnicity: United State, 2011-2018**

| Variables                                                          | 2011-2012 |       | 2013-2014 |       | 2015-2016 |       | 2017-2018 |       |
|--------------------------------------------------------------------|-----------|-------|-----------|-------|-----------|-------|-----------|-------|
|                                                                    | N         | Cases | N         | Cases | N         | Cases | N         | Cases |
| <b>General Obesity defined by BMI (N=21,093)</b>                   |           |       |           |       |           |       |           |       |
| Overall (Asian specific cut off points for Asians) <sup>a</sup>    | 5181      | 1927  | 5455      | 2129  | 5337      | 2244  | 5120      | 2266  |
| Overall (cut off points for general population) <sup>b</sup>       | 5181      | 1855  | 5455      | 2060  | 5337      | 2159  | 5120      | 2142  |
| <b>All participants</b>                                            |           |       |           |       |           |       |           |       |
| Hispanic                                                           | 1037      | 438   | 1214      | 513   | 1633      | 778   | 1153      | 524   |
| Non Hispanic white                                                 | 1899      | 653   | 2343      | 874   | 1751      | 679   | 1764      | 772   |
| Non-Hispanic black                                                 | 1364      | 640   | 1115      | 532   | 1126      | 531   | 1204      | 600   |
| Non-Hispanic Asian                                                 | 733       | 147   | 623       | 146   | 637       | 160   | 739       | 243   |
| Other                                                              | 148       | 49    | 160       | 64    | 190       | 96    | 260       | 127   |
| <b>Male</b>                                                        |           |       |           |       |           |       |           |       |
| Hispanic                                                           | 515       | 202   | 573       | 211   | 740       | 317   | 549       | 244   |
| Non-Hispanic white                                                 | 961       | 311   | 1130      | 383   | 891       | 338   | 879       | 391   |
| Non-Hispanic black                                                 | 662       | 247   | 556       | 211   | 530       | 199   | 576       | 232   |
| Non-Hispanic Asian                                                 | 365       | 76    | 300       | 73    | 321       | 83    | 344       | 122   |
| Other                                                              | 82        | 27    | 79        | 31    | 101       | 46    | 145       | 66    |
| <b>Female</b>                                                      |           |       |           |       |           |       |           |       |
| Hispanic                                                           | 522       | 236   | 641       | 302   | 893       | 461   | 604       | 280   |
| Non-Hispanic white                                                 | 938       | 342   | 1213      | 491   | 860       | 341   | 885       | 381   |
| Non-Hispanic black                                                 | 702       | 393   | 559       | 321   | 596       | 332   | 628       | 368   |
| Non-Hispanic Asian                                                 | 368       | 71    | 323       | 73    | 316       | 77    | 395       | 121   |
| Other                                                              | 66        | 22    | 81        | 33    | 89        | 50    | 115       | 61    |
| <b>Abdominal obesity defined by waist circumference (N=20,080)</b> |           |       |           |       |           |       |           |       |

|                    |      |      |      |      |      |      |      |      |
|--------------------|------|------|------|------|------|------|------|------|
| Overall            | 4924 | 2631 | 5210 | 2945 | 5053 | 2965 | 4893 | 2943 |
| All participants   |      |      |      |      |      |      |      |      |
| Hispanic           | 993  | 571  | 1173 | 718  | 1566 | 1032 | 1095 | 698  |
| Non-Hispanic white | 1809 | 1047 | 2233 | 1338 | 1674 | 1043 | 1697 | 1120 |
| Non-Hispanic black | 1287 | 779  | 1054 | 656  | 1051 | 636  | 1150 | 739  |
| Non-Hispanic Asian | 693  | 163  | 595  | 152  | 587  | 148  | 704  | 227  |
| Other              | 142  | 71   | 155  | 81   | 175  | 106  | 247  | 159  |
| Male               |      |      |      |      |      |      |      |      |
| Hispanic           | 494  | 213  | 557  | 252  | 715  | 353  | 520  | 259  |
| Non-Hispanic white | 926  | 447  | 1084 | 546  | 857  | 461  | 856  | 505  |
| Non-Hispanic black | 632  | 266  | 532  | 228  | 504  | 214  | 558  | 258  |
| Non-Hispanic Asian | 347  | 47   | 289  | 39   | 302  | 44   | 335  | 72   |
| Other              | 80   | 36   | 77   | 31   | 94   | 43   | 140  | 78   |
| Female             |      |      |      |      |      |      |      |      |
| Hispanic           | 499  | 358  | 616  | 466  | 851  | 679  | 575  | 439  |
| Non-Hispanic white | 883  | 600  | 1149 | 792  | 817  | 582  | 841  | 615  |
| Non-Hispanic black | 655  | 513  | 522  | 428  | 547  | 422  | 592  | 481  |
| Non-Hispanic Asian | 346  | 116  | 306  | 113  | 285  | 104  | 369  | 155  |
| Other              | 62   | 35   | 78   | 50   | 81   | 63   | 107  | 81   |

<sup>a</sup> Obesity was defined as BMI  $\geq 27.5$  kg/m<sup>2</sup> for Asians.

<sup>b</sup> Obesity was defined as BMI  $\geq 30$  kg/m<sup>2</sup> for non-Asians

**Appendix Table 11. Trends in Unadjusted Prevalence of Obesity by Race/Ethnicity: United State, 2011-2018**

| Variables                                                       | Unadjusted Prevalence, % (95%CI) |                     |                     |                     | P for trend |
|-----------------------------------------------------------------|----------------------------------|---------------------|---------------------|---------------------|-------------|
|                                                                 | 2011-2012                        | 2013-2014           | 2015-2016           | 2017-2018           |             |
| <b>General Obesity defined by BMI (N=21,093)</b>                |                                  |                     |                     |                     |             |
| Overall (Asian specific cut off points for Asians) <sup>a</sup> | 35.7 (32.8 to 38.5)              | 38.5 (36.7 to 40.3) | 40.5 (37.3 to 43.7) | 43.4 (39.9 to 47.1) | <0.001      |
| Overall (cut off points for general population) <sup>b</sup>    | 35.1 (32.2 to 38.1)              | 37.9 (36.1 to 39.7) | 39.8 (36.4 to 43.1) | 42.5 (38.7 to 46.3) | 0.001       |
| <b>All participants</b>                                         |                                  |                     |                     |                     |             |
| Hispanic                                                        | 42.0 (38.2 to 45.7)              | 42.7 (38.1 to 47.2) | 46.8 (42.3 to 51.2) | 44.8 (41.1 to 48.6) | 0.13        |
| Non-Hispanic white                                              | 33.4 (29.6 to 37.2)              | 37.1 (34.9 to 39.3) | 38.7 (35.1 to 42.2) | 42.7 (37.4 to 48.1) | 0.003       |
| Non-Hispanic black                                              | 47.8 (44.3 to 51.4)              | 48.5 (44.2 to 52.7) | 46.8 (42.0 to 51.6) | 49.4 (46.4 to 52.4) | 0.67        |
| Non-Hispanic Asian                                              | 20.7 (17.0 to 24.5)              | 23.5 (20.2 to 26.8) | 25.6 (20.0 to 31.3) | 34.1 (29.7 to 38.6) | <0.001      |
| Other                                                           | 35.0 (22.2 to 47.8)              | 38.1 (28.4 to 47.8) | 51.4 (43.9 to 59.0) | 46.7 (35.0 to 58.3) | 0.09        |
| <b>Male</b>                                                     |                                  |                     |                     |                     |             |
| Hispanic                                                        | 40.7 (35.8 to 45.6)              | 38.8 (32.9 to 44.7) | 43.5 (37.2 to 49.9) | 46.0 (41.8 to 50.2) | 0.04        |
| Non-Hispanic white                                              | 33.1 (30.3 to 35.9)              | 35.4 (32.2 to 38.6) | 38.4 (33.1 to 43.6) | 45.1 (37.4 to 52.8) | 0.002       |
| Non-Hispanic black                                              | 37.0 (33.1 to 40.9)              | 38.2 (32.8 to 43.5) | 36.8 (31.1 to 42.5) | 40.5 (35.3 to 45.7) | 0.36        |
| Non-Hispanic Asian                                              | 21.9 (16.8 to 27.0)              | 25.5 (19.8 to 31.2) | 26.3 (20.6 to 32.0) | 37.2 (30.2 to 44.1) | <0.001      |
| Other                                                           | 40.6 (18.3 to 62.9)              | 38.1 (24.2 to 52.1) | 52.9 (40.4 to 65.4) | 40.4 (26.5 to 54.2) | 0.85        |
| <b>Female <sup>c</sup></b>                                      |                                  |                     |                     |                     |             |
| Hispanic                                                        | 43.3 (38.4 to 48.1)              | 46.6 (40.2 to 52.9) | 50.0 (45.7 to 54.4) | 43.6 (39.1 to 48.1) | 0.72        |
| Non-Hispanic white                                              | 33.7 (27.8 to 39.5)              | 38.7 (35.3 to 42.1) | 39.0 (34.9 to 43.0) | 40.5 (34.4 to 46.6) | 0.09        |
| Non-Hispanic black                                              | 56.7 (52.3 to 61.1)              | 57.2 (53.5 to 60.9) | 55.0 (50.2 to 59.8) | 56.8 (52.8 to 60.9) | 0.85        |
| Non-Hispanic Asian                                              | 19.7 (15.1 to 24.3)              | 21.8 (17.0 to 26.6) | 25.1 (17.9 to 32.2) | 31.6 (26.5 to 36.6) | <0.001      |
| Other                                                           | 29.3 (17.8 to 40.8)              | 38.0 (25.4 to 50.6) | 50.0 (39.1 to 60.8) | 54.5 (41.3 to 67.7) | 0.003       |



| <b>Abdominal obesity defined by waist circumference (N=20,080)</b> |                     |                     |                     |                     |        |
|--------------------------------------------------------------------|---------------------|---------------------|---------------------|---------------------|--------|
| Overall                                                            | 55.4 (51.3 to 59.4) | 57.1 (55.7 to 58.4) | 59.4 (54.7 to 64.1) | 60.3 (56.8 to 63.8) | 0.03   |
| <b>All participants</b>                                            |                     |                     |                     |                     |        |
| Hispanic                                                           | 55.9 (52.1 to 59.7) | 58.8 (54.3 to 63.4) | 60.5 (56.6 to 64.4) | 58.9 (55.6 to 62.3) | 0.18   |
| Non-Hispanic white                                                 | 56.8 (51.9 to 61.7) | 58.6 (56.6 to 60.5) | 61.8 (56.4 to 67.2) | 62.4 (57.8 to 67.0) | 0.049  |
| Non-Hispanic black                                                 | 60.6 (57.2 to 64.0) | 62.0 (58.3 to 65.8) | 58.8 (54.1 to 63.5) | 61.9 (58.4 to 65.3) | 0.91   |
| Non-Hispanic Asian                                                 | 24.1 (20.5 to 27.7) | 25.6 (21.7 to 29.5) | 26.6 (22.6 to 30.6) | 31.9 (29.3 to 34.4) | <0.001 |
| Other                                                              | 54.6 (37.7 to 71.5) | 51.4 (40.0 to 62.8) | 64.4 (54.4 to 74.4) | 67.6 (58.2 to 77.0) | 0.06   |
| <b>Male</b>                                                        |                     |                     |                     |                     |        |
| Hispanic                                                           | 42.8 (36.7 to 48.8) | 44.6 (40.2 to 49.0) | 45.7 (40.3 to 51.1) | 47.5 (43.7 to 51.4) | 0.15   |
| Non-Hispanic white                                                 | 47.4 (42.8 to 51.9) | 50.3 (47.1 to 53.5) | 53.0 (46.0 to 59.9) | 56.0 (49.6 to 62.5) | 0.02   |
| Non-Hispanic black                                                 | 40.6 (36.7 to 44.4) | 40.0 (35.1 to 45.0) | 39.8 (33.7 to 45.9) | 43.0 (38.4 to 47.6) | 0.44   |
| Non-Hispanic Asian                                                 | 13.8 (10.0 to 17.7) | 13.6 (8.4 to 18.7)  | 15.6 (11.2 to 20.0) | 20.9 (17.7 to 24.1) | 0.006  |
| Other                                                              | 47.4 (26.0 to 68.7) | 38.7 (23.1 to 54.2) | 50.4 (39.6 to 61.3) | 57.3 (40.3 to 74.3) | 0.24   |
| <b>Female</b>                                                      |                     |                     |                     |                     |        |
| Hispanic                                                           | 69.2 (64.5 to 74.0) | 73.4 (66.5 to 80.4) | 75.8 (72.6 to 79.1) | 70.6 (65.8 to 75.3) | 0.61   |
| Non-Hispanic white                                                 | 66.1 (60.5 to 71.7) | 66.6 (63.7 to 69.6) | 70.4 (65.3 to 75.4) | 68.5 (62.9 to 74.0) | 0.35   |
| Non-Hispanic black                                                 | 77.3 (73.0 to 81.6) | 81.3 (78.6 to 84.1) | 75.0 (70.8 to 79.2) | 78.2 (74.0 to 82.3) | 0.69   |
| Non-Hispanic Asian                                                 | 33.4 (28.3 to 38.5) | 36.0 (30.4 to 41.6) | 36.8 (32.4 to 41.3) | 41.6 (37.3 to 45.9) | 0.01   |
| Other                                                              | 62.2 (42.3 to 82.1) | 66.6 (55.3 to 77.9) | 77.9 (67.8 to 87.9) | 80.5 (73.5 to 87.6) | 0.02   |

<sup>a</sup> Obesity was defined as BMI  $\geq 27.5$  kg/m<sup>2</sup> for Asians.

<sup>b</sup> Obesity was defined as BMI  $\geq 30$  kg/m<sup>2</sup> for non-Asians
